# Supplementary material
Source: publisher site journal article supplement (https://www.dovepress.com/article/535492)
Supplement: Supplementary file 1 [file supplementary%20material.docx]

**Table S1.** Radiomics features associated with RFS selected by LASSO regression.

| Radiomics features | Coefficients |
| --- | --- |
| wavelet-LLH_firstorder_Minimum | -0.0005209257851529986 |
| wavelet-LLH_firstorder_RootMeanSquared | 0.11267271923310583 |
| wavelet-LLH_firstorder_Skewness | -0.26533765722223396 |
| wavelet-LLH_glcm_ClusterTendency | 0.7526393296802043 |
| wavelet-LLH_glcm_MCC | 22.838234591092622 |
| wavelet-LLH_glszm_LargeAreaLowGrayLevelEmphasis | 1.793584985764927e-08 |
| wavelet-LLH_ngtdm_Coarseness | 338.200788092314 |
| wavelet-LLH_ngtdm_Strength | 2.6371288488284756 |
| wavelet-LHL_glrlm_RunEntropy | -5.549312074134324 |
| wavelet-LHL_glszm_ZoneVariance | 2.114043485045088e-07 |
| wavelet-LHH_glcm_ClusterTendency | -15.38037658362921 |
| wavelet-LHH_glszm_GrayLevelNonUniformity | -0.0013283879898698882 |
| wavelet-HHL_gldm_DependenceEntropy | -8.64839891449183 |
| wavelet-HHH_firstorder_Kurtosis | 0.3297233187985916 |
| wavelet-HHH_glcm_ClusterTendency | -423.07955849966504 |

**Table S2.** Radiomics type and feature name.

| Image type | Feature Class | Feature Name |
| --- | --- | --- |
| original | shape | Elongation |
| original | shape | Flatness |
| original | shape | LeastAxisLength |
| original | shape | MajorAxisLength |
| original | shape | Maximum2DDiameterColumn |
| original | shape | Maximum2DDiameterRow |
| original | shape | Maximum2DDiameterSlice |
| original | shape | Maximum3DDiameter |
| original | shape | MeshVolume |
| original | shape | MinorAxisLength |
| original | shape | Sphericity |
| original | shape | SurfaceArea |
| original | shape | SurfaceVolumeRatio |
| original | shape | VoxelVolume |
| original | firstorder | 10Percentile |
| original | firstorder | 90Percentile |
| original | firstorder | Energy |
| original | firstorder | Entropy |
| original | firstorder | InterquartileRange |
| original | firstorder | Kurtosis |
| original | firstorder | Maximum |
| original | firstorder | MeanAbsoluteDeviation |
| original | firstorder | Mean |
| original | firstorder | Median |
| original | firstorder | Minimum |
| original | firstorder | Range |
| original | firstorder | RobustMeanAbsoluteDeviation |
| original | firstorder | RootMeanSquared |
| original | firstorder | Skewness |
| original | firstorder | TotalEnergy |
| original | firstorder | Uniformity |
| original | firstorder | Variance |
| original | glcm | Autocorrelation |
| original | glcm | ClusterProminence |
| original | glcm | ClusterShade |
| original | glcm | ClusterTendency |
| original | glcm | Contrast |
| original | glcm | Correlation |
| original | glcm | DifferenceAverage |
| original | glcm | DifferenceEntropy |
| original | glcm | DifferenceVariance |
| original | glcm | Id |
| original | glcm | Idm |
| original | glcm | Idmn |
| original | glcm | Idn |
| original | glcm | Imc1 |
| original | glcm | Imc2 |
| original | glcm | InverseVariance |
| original | glcm | JointAverage |
| original | glcm | JointEnergy |
| original | glcm | JointEntropy |
| original | glcm | MCC |
| original | glcm | MaximumProbability |
| original | glcm | SumAverage |
| original | glcm | SumEntropy |
| original | glcm | SumSquares |
| original | gldm | DependenceEntropy |
| original | gldm | DependenceNonUniformity |
| original | gldm | DependenceNonUniformityNormalized |
| original | gldm | DependenceVariance |
| original | gldm | GrayLevelNonUniformity |
| original | gldm | GrayLevelVariance |
| original | gldm | HighGrayLevelEmphasis |
| original | gldm | LargeDependenceEmphasis |
| original | gldm | LargeDependenceHighGrayLevelEmphasis |
| original | gldm | LargeDependenceLowGrayLevelEmphasis |
| original | gldm | LowGrayLevelEmphasis |
| original | gldm | SmallDependenceEmphasis |
| original | gldm | SmallDependenceHighGrayLevelEmphasis |
| original | gldm | SmallDependenceLowGrayLevelEmphasis |
| original | glrlm | GrayLevelNonUniformity |
| original | glrlm | GrayLevelNonUniformityNormalized |
| original | glrlm | GrayLevelVariance |
| original | glrlm | HighGrayLevelRunEmphasis |
| original | glrlm | LongRunEmphasis |
| original | glrlm | LongRunHighGrayLevelEmphasis |
| original | glrlm | LongRunLowGrayLevelEmphasis |
| original | glrlm | LowGrayLevelRunEmphasis |
| original | glrlm | RunEntropy |
| original | glrlm | RunLengthNonUniformity |
| original | glrlm | RunLengthNonUniformityNormalized |
| original | glrlm | RunPercentage |
| original | glrlm | RunVariance |
| original | glrlm | ShortRunEmphasis |
| original | glrlm | ShortRunHighGrayLevelEmphasis |
| original | glrlm | ShortRunLowGrayLevelEmphasis |
| original | glszm | GrayLevelNonUniformity |
| original | glszm | GrayLevelNonUniformityNormalized |
| original | glszm | GrayLevelVariance |
| original | glszm | HighGrayLevelZoneEmphasis |
| original | glszm | LargeAreaEmphasis |
| original | glszm | LargeAreaHighGrayLevelEmphasis |
| original | glszm | LargeAreaLowGrayLevelEmphasis |
| original | glszm | LowGrayLevelZoneEmphasis |
| original | glszm | SizeZoneNonUniformity |
| original | glszm | SizeZoneNonUniformityNormalized |
| original | glszm | SmallAreaEmphasis |
| original | glszm | SmallAreaHighGrayLevelEmphasis |
| original | glszm | SmallAreaLowGrayLevelEmphasis |
| original | glszm | ZoneEntropy |
| original | glszm | ZonePercentage |
| original | glszm | ZoneVariance |
| original | ngtdm | Busyness |
| original | ngtdm | Coarseness |
| original | ngtdm | Complexity |
| original | ngtdm | Contrast |
| original | ngtdm | Strength |
| wavelet-LLH | firstorder | 10Percentile |
| wavelet-LLH | firstorder | 90Percentile |
| wavelet-LLH | firstorder | Energy |
| wavelet-LLH | firstorder | Entropy |
| wavelet-LLH | firstorder | InterquartileRange |
| wavelet-LLH | firstorder | Kurtosis |
| wavelet-LLH | firstorder | Maximum |
| wavelet-LLH | firstorder | MeanAbsoluteDeviation |
| wavelet-LLH | firstorder | Mean |
| wavelet-LLH | firstorder | Median |
| wavelet-LLH | firstorder | Minimum |
| wavelet-LLH | firstorder | Range |
| wavelet-LLH | firstorder | RobustMeanAbsoluteDeviation |
| wavelet-LLH | firstorder | RootMeanSquared |
| wavelet-LLH | firstorder | Skewness |
| wavelet-LLH | firstorder | TotalEnergy |
| wavelet-LLH | firstorder | Uniformity |
| wavelet-LLH | firstorder | Variance |
| wavelet-LLH | glcm | Autocorrelation |
| wavelet-LLH | glcm | ClusterProminence |
| wavelet-LLH | glcm | ClusterShade |
| wavelet-LLH | glcm | ClusterTendency |
| wavelet-LLH | glcm | Contrast |
| wavelet-LLH | glcm | Correlation |
| wavelet-LLH | glcm | DifferenceAverage |
| wavelet-LLH | glcm | DifferenceEntropy |
| wavelet-LLH | glcm | DifferenceVariance |
| wavelet-LLH | glcm | Id |
| wavelet-LLH | glcm | Idm |
| wavelet-LLH | glcm | Idmn |
| wavelet-LLH | glcm | Idn |
| wavelet-LLH | glcm | Imc1 |
| wavelet-LLH | glcm | Imc2 |
| wavelet-LLH | glcm | InverseVariance |
| wavelet-LLH | glcm | JointAverage |
| wavelet-LLH | glcm | JointEnergy |
| wavelet-LLH | glcm | JointEntropy |
| wavelet-LLH | glcm | MCC |
| wavelet-LLH | glcm | MaximumProbability |
| wavelet-LLH | glcm | SumAverage |
| wavelet-LLH | glcm | SumEntropy |
| wavelet-LLH | glcm | SumSquares |
| wavelet-LLH | gldm | DependenceEntropy |
| wavelet-LLH | gldm | DependenceNonUniformity |
| wavelet-LLH | gldm | DependenceNonUniformityNormalized |
| wavelet-LLH | gldm | DependenceVariance |
| wavelet-LLH | gldm | GrayLevelNonUniformity |
| wavelet-LLH | gldm | GrayLevelVariance |
| wavelet-LLH | gldm | HighGrayLevelEmphasis |
| wavelet-LLH | gldm | LargeDependenceEmphasis |
| wavelet-LLH | gldm | LargeDependenceHighGrayLevelEmphasis |
| wavelet-LLH | gldm | LargeDependenceLowGrayLevelEmphasis |
| wavelet-LLH | gldm | LowGrayLevelEmphasis |
| wavelet-LLH | gldm | SmallDependenceEmphasis |
| wavelet-LLH | gldm | SmallDependenceHighGrayLevelEmphasis |
| wavelet-LLH | gldm | SmallDependenceLowGrayLevelEmphasis |
| wavelet-LLH | glrlm | GrayLevelNonUniformity |
| wavelet-LLH | glrlm | GrayLevelNonUniformityNormalized |
| wavelet-LLH | glrlm | GrayLevelVariance |
| wavelet-LLH | glrlm | HighGrayLevelRunEmphasis |
| wavelet-LLH | glrlm | LongRunEmphasis |
| wavelet-LLH | glrlm | LongRunHighGrayLevelEmphasis |
| wavelet-LLH | glrlm | LongRunLowGrayLevelEmphasis |
| wavelet-LLH | glrlm | LowGrayLevelRunEmphasis |
| wavelet-LLH | glrlm | RunEntropy |
| wavelet-LLH | glrlm | RunLengthNonUniformity |
| wavelet-LLH | glrlm | RunLengthNonUniformityNormalized |
| wavelet-LLH | glrlm | RunPercentage |
| wavelet-LLH | glrlm | RunVariance |
| wavelet-LLH | glrlm | ShortRunEmphasis |
| wavelet-LLH | glrlm | ShortRunHighGrayLevelEmphasis |
| wavelet-LLH | glrlm | ShortRunLowGrayLevelEmphasis |
| wavelet-LLH | glszm | GrayLevelNonUniformity |
| wavelet-LLH | glszm | GrayLevelNonUniformityNormalized |
| wavelet-LLH | glszm | GrayLevelVariance |
| wavelet-LLH | glszm | HighGrayLevelZoneEmphasis |
| wavelet-LLH | glszm | LargeAreaEmphasis |
| wavelet-LLH | glszm | LargeAreaHighGrayLevelEmphasis |
| wavelet-LLH | glszm | LargeAreaLowGrayLevelEmphasis |
| wavelet-LLH | glszm | LowGrayLevelZoneEmphasis |
| wavelet-LLH | glszm | SizeZoneNonUniformity |
| wavelet-LLH | glszm | SizeZoneNonUniformityNormalized |
| wavelet-LLH | glszm | SmallAreaEmphasis |
| wavelet-LLH | glszm | SmallAreaHighGrayLevelEmphasis |
| wavelet-LLH | glszm | SmallAreaLowGrayLevelEmphasis |
| wavelet-LLH | glszm | ZoneEntropy |
| wavelet-LLH | glszm | ZonePercentage |
| wavelet-LLH | glszm | ZoneVariance |
| wavelet-LLH | ngtdm | Busyness |
| wavelet-LLH | ngtdm | Coarseness |
| wavelet-LLH | ngtdm | Complexity |
| wavelet-LLH | ngtdm | Contrast |
| wavelet-LLH | ngtdm | Strength |
| wavelet-LHL | firstorder | 10Percentile |
| wavelet-LHL | firstorder | 90Percentile |
| wavelet-LHL | firstorder | Energy |
| wavelet-LHL | firstorder | Entropy |
| wavelet-LHL | firstorder | InterquartileRange |
| wavelet-LHL | firstorder | Kurtosis |
| wavelet-LHL | firstorder | Maximum |
| wavelet-LHL | firstorder | MeanAbsoluteDeviation |
| wavelet-LHL | firstorder | Mean |
| wavelet-LHL | firstorder | Median |
| wavelet-LHL | firstorder | Minimum |
| wavelet-LHL | firstorder | Range |
| wavelet-LHL | firstorder | RobustMeanAbsoluteDeviation |
| wavelet-LHL | firstorder | RootMeanSquared |
| wavelet-LHL | firstorder | Skewness |
| wavelet-LHL | firstorder | TotalEnergy |
| wavelet-LHL | firstorder | Uniformity |
| wavelet-LHL | firstorder | Variance |
| wavelet-LHL | glcm | Autocorrelation |
| wavelet-LHL | glcm | ClusterProminence |
| wavelet-LHL | glcm | ClusterShade |
| wavelet-LHL | glcm | ClusterTendency |
| wavelet-LHL | glcm | Contrast |
| wavelet-LHL | glcm | Correlation |
| wavelet-LHL | glcm | DifferenceAverage |
| wavelet-LHL | glcm | DifferenceEntropy |
| wavelet-LHL | glcm | DifferenceVariance |
| wavelet-LHL | glcm | Id |
| wavelet-LHL | glcm | Idm |
| wavelet-LHL | glcm | Idmn |
| wavelet-LHL | glcm | Idn |
| wavelet-LHL | glcm | Imc1 |
| wavelet-LHL | glcm | Imc2 |
| wavelet-LHL | glcm | InverseVariance |
| wavelet-LHL | glcm | JointAverage |
| wavelet-LHL | glcm | JointEnergy |
| wavelet-LHL | glcm | JointEntropy |
| wavelet-LHL | glcm | MCC |
| wavelet-LHL | glcm | MaximumProbability |
| wavelet-LHL | glcm | SumAverage |
| wavelet-LHL | glcm | SumEntropy |
| wavelet-LHL | glcm | SumSquares |
| wavelet-LHL | gldm | DependenceEntropy |
| wavelet-LHL | gldm | DependenceNonUniformity |
| wavelet-LHL | gldm | DependenceNonUniformityNormalized |
| wavelet-LHL | gldm | DependenceVariance |
| wavelet-LHL | gldm | GrayLevelNonUniformity |
| wavelet-LHL | gldm | GrayLevelVariance |
| wavelet-LHL | gldm | HighGrayLevelEmphasis |
| wavelet-LHL | gldm | LargeDependenceEmphasis |
| wavelet-LHL | gldm | LargeDependenceHighGrayLevelEmphasis |
| wavelet-LHL | gldm | LargeDependenceLowGrayLevelEmphasis |
| wavelet-LHL | gldm | LowGrayLevelEmphasis |
| wavelet-LHL | gldm | SmallDependenceEmphasis |
| wavelet-LHL | gldm | SmallDependenceHighGrayLevelEmphasis |
| wavelet-LHL | gldm | SmallDependenceLowGrayLevelEmphasis |
| wavelet-LHL | glrlm | GrayLevelNonUniformity |
| wavelet-LHL | glrlm | GrayLevelNonUniformityNormalized |
| wavelet-LHL | glrlm | GrayLevelVariance |
| wavelet-LHL | glrlm | HighGrayLevelRunEmphasis |
| wavelet-LHL | glrlm | LongRunEmphasis |
| wavelet-LHL | glrlm | LongRunHighGrayLevelEmphasis |
| wavelet-LHL | glrlm | LongRunLowGrayLevelEmphasis |
| wavelet-LHL | glrlm | LowGrayLevelRunEmphasis |
| wavelet-LHL | glrlm | RunEntropy |
| wavelet-LHL | glrlm | RunLengthNonUniformity |
| wavelet-LHL | glrlm | RunLengthNonUniformityNormalized |
| wavelet-LHL | glrlm | RunPercentage |
| wavelet-LHL | glrlm | RunVariance |
| wavelet-LHL | glrlm | ShortRunEmphasis |
| wavelet-LHL | glrlm | ShortRunHighGrayLevelEmphasis |
| wavelet-LHL | glrlm | ShortRunLowGrayLevelEmphasis |
| wavelet-LHL | glszm | GrayLevelNonUniformity |
| wavelet-LHL | glszm | GrayLevelNonUniformityNormalized |
| wavelet-LHL | glszm | GrayLevelVariance |
| wavelet-LHL | glszm | HighGrayLevelZoneEmphasis |
| wavelet-LHL | glszm | LargeAreaEmphasis |
| wavelet-LHL | glszm | LargeAreaHighGrayLevelEmphasis |
| wavelet-LHL | glszm | LargeAreaLowGrayLevelEmphasis |
| wavelet-LHL | glszm | LowGrayLevelZoneEmphasis |
| wavelet-LHL | glszm | SizeZoneNonUniformity |
| wavelet-LHL | glszm | SizeZoneNonUniformityNormalized |
| wavelet-LHL | glszm | SmallAreaEmphasis |
| wavelet-LHL | glszm | SmallAreaHighGrayLevelEmphasis |
| wavelet-LHL | glszm | SmallAreaLowGrayLevelEmphasis |
| wavelet-LHL | glszm | ZoneEntropy |
| wavelet-LHL | glszm | ZonePercentage |
| wavelet-LHL | glszm | ZoneVariance |
| wavelet-LHL | ngtdm | Busyness |
| wavelet-LHL | ngtdm | Coarseness |
| wavelet-LHL | ngtdm | Complexity |
| wavelet-LHL | ngtdm | Contrast |
| wavelet-LHL | ngtdm | Strength |
| wavelet-LHH | firstorder | 10Percentile |
| wavelet-LHH | firstorder | 90Percentile |
| wavelet-LHH | firstorder | Energy |
| wavelet-LHH | firstorder | Entropy |
| wavelet-LHH | firstorder | InterquartileRange |
| wavelet-LHH | firstorder | Kurtosis |
| wavelet-LHH | firstorder | Maximum |
| wavelet-LHH | firstorder | MeanAbsoluteDeviation |
| wavelet-LHH | firstorder | Mean |
| wavelet-LHH | firstorder | Median |
| wavelet-LHH | firstorder | Minimum |
| wavelet-LHH | firstorder | Range |
| wavelet-LHH | firstorder | RobustMeanAbsoluteDeviation |
| wavelet-LHH | firstorder | RootMeanSquared |
| wavelet-LHH | firstorder | Skewness |
| wavelet-LHH | firstorder | TotalEnergy |
| wavelet-LHH | firstorder | Uniformity |
| wavelet-LHH | firstorder | Variance |
| wavelet-LHH | glcm | Autocorrelation |
| wavelet-LHH | glcm | ClusterProminence |
| wavelet-LHH | glcm | ClusterShade |
| wavelet-LHH | glcm | ClusterTendency |
| wavelet-LHH | glcm | Contrast |
| wavelet-LHH | glcm | Correlation |
| wavelet-LHH | glcm | DifferenceAverage |
| wavelet-LHH | glcm | DifferenceEntropy |
| wavelet-LHH | glcm | DifferenceVariance |
| wavelet-LHH | glcm | Id |
| wavelet-LHH | glcm | Idm |
| wavelet-LHH | glcm | Idmn |
| wavelet-LHH | glcm | Idn |
| wavelet-LHH | glcm | Imc1 |
| wavelet-LHH | glcm | Imc2 |
| wavelet-LHH | glcm | InverseVariance |
| wavelet-LHH | glcm | JointAverage |
| wavelet-LHH | glcm | JointEnergy |
| wavelet-LHH | glcm | JointEntropy |
| wavelet-LHH | glcm | MCC |
| wavelet-LHH | glcm | MaximumProbability |
| wavelet-LHH | glcm | SumAverage |
| wavelet-LHH | glcm | SumEntropy |
| wavelet-LHH | glcm | SumSquares |
| wavelet-LHH | gldm | DependenceEntropy |
| wavelet-LHH | gldm | DependenceNonUniformity |
| wavelet-LHH | gldm | DependenceNonUniformityNormalized |
| wavelet-LHH | gldm | DependenceVariance |
| wavelet-LHH | gldm | GrayLevelNonUniformity |
| wavelet-LHH | gldm | GrayLevelVariance |
| wavelet-LHH | gldm | HighGrayLevelEmphasis |
| wavelet-LHH | gldm | LargeDependenceEmphasis |
| wavelet-LHH | gldm | LargeDependenceHighGrayLevelEmphasis |
| wavelet-LHH | gldm | LargeDependenceLowGrayLevelEmphasis |
| wavelet-LHH | gldm | LowGrayLevelEmphasis |
| wavelet-LHH | gldm | SmallDependenceEmphasis |
| wavelet-LHH | gldm | SmallDependenceHighGrayLevelEmphasis |
| wavelet-LHH | gldm | SmallDependenceLowGrayLevelEmphasis |
| wavelet-LHH | glrlm | GrayLevelNonUniformity |
| wavelet-LHH | glrlm | GrayLevelNonUniformityNormalized |
| wavelet-LHH | glrlm | GrayLevelVariance |
| wavelet-LHH | glrlm | HighGrayLevelRunEmphasis |
| wavelet-LHH | glrlm | LongRunEmphasis |
| wavelet-LHH | glrlm | LongRunHighGrayLevelEmphasis |
| wavelet-LHH | glrlm | LongRunLowGrayLevelEmphasis |
| wavelet-LHH | glrlm | LowGrayLevelRunEmphasis |
| wavelet-LHH | glrlm | RunEntropy |
| wavelet-LHH | glrlm | RunLengthNonUniformity |
| wavelet-LHH | glrlm | RunLengthNonUniformityNormalized |
| wavelet-LHH | glrlm | RunPercentage |
| wavelet-LHH | glrlm | RunVariance |
| wavelet-LHH | glrlm | ShortRunEmphasis |
| wavelet-LHH | glrlm | ShortRunHighGrayLevelEmphasis |
| wavelet-LHH | glrlm | ShortRunLowGrayLevelEmphasis |
| wavelet-LHH | glszm | GrayLevelNonUniformity |
| wavelet-LHH | glszm | GrayLevelNonUniformityNormalized |
| wavelet-LHH | glszm | GrayLevelVariance |
| wavelet-LHH | glszm | HighGrayLevelZoneEmphasis |
| wavelet-LHH | glszm | LargeAreaEmphasis |
| wavelet-LHH | glszm | LargeAreaHighGrayLevelEmphasis |
| wavelet-LHH | glszm | LargeAreaLowGrayLevelEmphasis |
| wavelet-LHH | glszm | LowGrayLevelZoneEmphasis |
| wavelet-LHH | glszm | SizeZoneNonUniformity |
| wavelet-LHH | glszm | SizeZoneNonUniformityNormalized |
| wavelet-LHH | glszm | SmallAreaEmphasis |
| wavelet-LHH | glszm | SmallAreaHighGrayLevelEmphasis |
| wavelet-LHH | glszm | SmallAreaLowGrayLevelEmphasis |
| wavelet-LHH | glszm | ZoneEntropy |
| wavelet-LHH | glszm | ZonePercentage |
| wavelet-LHH | glszm | ZoneVariance |
| wavelet-LHH | ngtdm | Busyness |
| wavelet-LHH | ngtdm | Coarseness |
| wavelet-LHH | ngtdm | Complexity |
| wavelet-LHH | ngtdm | Contrast |
| wavelet-LHH | ngtdm | Strength |
| wavelet-HLL | firstorder | 10Percentile |
| wavelet-HLL | firstorder | 90Percentile |
| wavelet-HLL | firstorder | Energy |
| wavelet-HLL | firstorder | Entropy |
| wavelet-HLL | firstorder | InterquartileRange |
| wavelet-HLL | firstorder | Kurtosis |
| wavelet-HLL | firstorder | Maximum |
| wavelet-HLL | firstorder | MeanAbsoluteDeviation |
| wavelet-HLL | firstorder | Mean |
| wavelet-HLL | firstorder | Median |
| wavelet-HLL | firstorder | Minimum |
| wavelet-HLL | firstorder | Range |
| wavelet-HLL | firstorder | RobustMeanAbsoluteDeviation |
| wavelet-HLL | firstorder | RootMeanSquared |
| wavelet-HLL | firstorder | Skewness |
| wavelet-HLL | firstorder | TotalEnergy |
| wavelet-HLL | firstorder | Uniformity |
| wavelet-HLL | firstorder | Variance |
| wavelet-HLL | glcm | Autocorrelation |
| wavelet-HLL | glcm | ClusterProminence |
| wavelet-HLL | glcm | ClusterShade |
| wavelet-HLL | glcm | ClusterTendency |
| wavelet-HLL | glcm | Contrast |
| wavelet-HLL | glcm | Correlation |
| wavelet-HLL | glcm | DifferenceAverage |
| wavelet-HLL | glcm | DifferenceEntropy |
| wavelet-HLL | glcm | DifferenceVariance |
| wavelet-HLL | glcm | Id |
| wavelet-HLL | glcm | Idm |
| wavelet-HLL | glcm | Idmn |
| wavelet-HLL | glcm | Idn |
| wavelet-HLL | glcm | Imc1 |
| wavelet-HLL | glcm | Imc2 |
| wavelet-HLL | glcm | InverseVariance |
| wavelet-HLL | glcm | JointAverage |
| wavelet-HLL | glcm | JointEnergy |
| wavelet-HLL | glcm | JointEntropy |
| wavelet-HLL | glcm | MCC |
| wavelet-HLL | glcm | MaximumProbability |
| wavelet-HLL | glcm | SumAverage |
| wavelet-HLL | glcm | SumEntropy |
| wavelet-HLL | glcm | SumSquares |
| wavelet-HLL | gldm | DependenceEntropy |
| wavelet-HLL | gldm | DependenceNonUniformity |
| wavelet-HLL | gldm | DependenceNonUniformityNormalized |
| wavelet-HLL | gldm | DependenceVariance |
| wavelet-HLL | gldm | GrayLevelNonUniformity |
| wavelet-HLL | gldm | GrayLevelVariance |
| wavelet-HLL | gldm | HighGrayLevelEmphasis |
| wavelet-HLL | gldm | LargeDependenceEmphasis |
| wavelet-HLL | gldm | LargeDependenceHighGrayLevelEmphasis |
| wavelet-HLL | gldm | LargeDependenceLowGrayLevelEmphasis |
| wavelet-HLL | gldm | LowGrayLevelEmphasis |
| wavelet-HLL | gldm | SmallDependenceEmphasis |
| wavelet-HLL | gldm | SmallDependenceHighGrayLevelEmphasis |
| wavelet-HLL | gldm | SmallDependenceLowGrayLevelEmphasis |
| wavelet-HLL | glrlm | GrayLevelNonUniformity |
| wavelet-HLL | glrlm | GrayLevelNonUniformityNormalized |
| wavelet-HLL | glrlm | GrayLevelVariance |
| wavelet-HLL | glrlm | HighGrayLevelRunEmphasis |
| wavelet-HLL | glrlm | LongRunEmphasis |
| wavelet-HLL | glrlm | LongRunHighGrayLevelEmphasis |
| wavelet-HLL | glrlm | LongRunLowGrayLevelEmphasis |
| wavelet-HLL | glrlm | LowGrayLevelRunEmphasis |
| wavelet-HLL | glrlm | RunEntropy |
| wavelet-HLL | glrlm | RunLengthNonUniformity |
| wavelet-HLL | glrlm | RunLengthNonUniformityNormalized |
| wavelet-HLL | glrlm | RunPercentage |
| wavelet-HLL | glrlm | RunVariance |
| wavelet-HLL | glrlm | ShortRunEmphasis |
| wavelet-HLL | glrlm | ShortRunHighGrayLevelEmphasis |
| wavelet-HLL | glrlm | ShortRunLowGrayLevelEmphasis |
| wavelet-HLL | glszm | GrayLevelNonUniformity |
| wavelet-HLL | glszm | GrayLevelNonUniformityNormalized |
| wavelet-HLL | glszm | GrayLevelVariance |
| wavelet-HLL | glszm | HighGrayLevelZoneEmphasis |
| wavelet-HLL | glszm | LargeAreaEmphasis |
| wavelet-HLL | glszm | LargeAreaHighGrayLevelEmphasis |
| wavelet-HLL | glszm | LargeAreaLowGrayLevelEmphasis |
| wavelet-HLL | glszm | LowGrayLevelZoneEmphasis |
| wavelet-HLL | glszm | SizeZoneNonUniformity |
| wavelet-HLL | glszm | SizeZoneNonUniformityNormalized |
| wavelet-HLL | glszm | SmallAreaEmphasis |
| wavelet-HLL | glszm | SmallAreaHighGrayLevelEmphasis |
| wavelet-HLL | glszm | SmallAreaLowGrayLevelEmphasis |
| wavelet-HLL | glszm | ZoneEntropy |
| wavelet-HLL | glszm | ZonePercentage |
| wavelet-HLL | glszm | ZoneVariance |
| wavelet-HLL | ngtdm | Busyness |
| wavelet-HLL | ngtdm | Coarseness |
| wavelet-HLL | ngtdm | Complexity |
| wavelet-HLL | ngtdm | Contrast |
| wavelet-HLL | ngtdm | Strength |
| wavelet-HLH | firstorder | 10Percentile |
| wavelet-HLH | firstorder | 90Percentile |
| wavelet-HLH | firstorder | Energy |
| wavelet-HLH | firstorder | Entropy |
| wavelet-HLH | firstorder | InterquartileRange |
| wavelet-HLH | firstorder | Kurtosis |
| wavelet-HLH | firstorder | Maximum |
| wavelet-HLH | firstorder | MeanAbsoluteDeviation |
| wavelet-HLH | firstorder | Mean |
| wavelet-HLH | firstorder | Median |
| wavelet-HLH | firstorder | Minimum |
| wavelet-HLH | firstorder | Range |
| wavelet-HLH | firstorder | RobustMeanAbsoluteDeviation |
| wavelet-HLH | firstorder | RootMeanSquared |
| wavelet-HLH | firstorder | Skewness |
| wavelet-HLH | firstorder | TotalEnergy |
| wavelet-HLH | firstorder | Uniformity |
| wavelet-HLH | firstorder | Variance |
| wavelet-HLH | glcm | Autocorrelation |
| wavelet-HLH | glcm | ClusterProminence |
| wavelet-HLH | glcm | ClusterShade |
| wavelet-HLH | glcm | ClusterTendency |
| wavelet-HLH | glcm | Contrast |
| wavelet-HLH | glcm | Correlation |
| wavelet-HLH | glcm | DifferenceAverage |
| wavelet-HLH | glcm | DifferenceEntropy |
| wavelet-HLH | glcm | DifferenceVariance |
| wavelet-HLH | glcm | Id |
| wavelet-HLH | glcm | Idm |
| wavelet-HLH | glcm | Idmn |
| wavelet-HLH | glcm | Idn |
| wavelet-HLH | glcm | Imc1 |
| wavelet-HLH | glcm | Imc2 |
| wavelet-HLH | glcm | InverseVariance |
| wavelet-HLH | glcm | JointAverage |
| wavelet-HLH | glcm | JointEnergy |
| wavelet-HLH | glcm | JointEntropy |
| wavelet-HLH | glcm | MCC |
| wavelet-HLH | glcm | MaximumProbability |
| wavelet-HLH | glcm | SumAverage |
| wavelet-HLH | glcm | SumEntropy |
| wavelet-HLH | glcm | SumSquares |
| wavelet-HLH | gldm | DependenceEntropy |
| wavelet-HLH | gldm | DependenceNonUniformity |
| wavelet-HLH | gldm | DependenceNonUniformityNormalized |
| wavelet-HLH | gldm | DependenceVariance |
| wavelet-HLH | gldm | GrayLevelNonUniformity |
| wavelet-HLH | gldm | GrayLevelVariance |
| wavelet-HLH | gldm | HighGrayLevelEmphasis |
| wavelet-HLH | gldm | LargeDependenceEmphasis |
| wavelet-HLH | gldm | LargeDependenceHighGrayLevelEmphasis |
| wavelet-HLH | gldm | LargeDependenceLowGrayLevelEmphasis |
| wavelet-HLH | gldm | LowGrayLevelEmphasis |
| wavelet-HLH | gldm | SmallDependenceEmphasis |
| wavelet-HLH | gldm | SmallDependenceHighGrayLevelEmphasis |
| wavelet-HLH | gldm | SmallDependenceLowGrayLevelEmphasis |
| wavelet-HLH | glrlm | GrayLevelNonUniformity |
| wavelet-HLH | glrlm | GrayLevelNonUniformityNormalized |
| wavelet-HLH | glrlm | GrayLevelVariance |
| wavelet-HLH | glrlm | HighGrayLevelRunEmphasis |
| wavelet-HLH | glrlm | LongRunEmphasis |
| wavelet-HLH | glrlm | LongRunHighGrayLevelEmphasis |
| wavelet-HLH | glrlm | LongRunLowGrayLevelEmphasis |
| wavelet-HLH | glrlm | LowGrayLevelRunEmphasis |
| wavelet-HLH | glrlm | RunEntropy |
| wavelet-HLH | glrlm | RunLengthNonUniformity |
| wavelet-HLH | glrlm | RunLengthNonUniformityNormalized |
| wavelet-HLH | glrlm | RunPercentage |
| wavelet-HLH | glrlm | RunVariance |
| wavelet-HLH | glrlm | ShortRunEmphasis |
| wavelet-HLH | glrlm | ShortRunHighGrayLevelEmphasis |
| wavelet-HLH | glrlm | ShortRunLowGrayLevelEmphasis |
| wavelet-HLH | glszm | GrayLevelNonUniformity |
| wavelet-HLH | glszm | GrayLevelNonUniformityNormalized |
| wavelet-HLH | glszm | GrayLevelVariance |
| wavelet-HLH | glszm | HighGrayLevelZoneEmphasis |
| wavelet-HLH | glszm | LargeAreaEmphasis |
| wavelet-HLH | glszm | LargeAreaHighGrayLevelEmphasis |
| wavelet-HLH | glszm | LargeAreaLowGrayLevelEmphasis |
| wavelet-HLH | glszm | LowGrayLevelZoneEmphasis |
| wavelet-HLH | glszm | SizeZoneNonUniformity |
| wavelet-HLH | glszm | SizeZoneNonUniformityNormalized |
| wavelet-HLH | glszm | SmallAreaEmphasis |
| wavelet-HLH | glszm | SmallAreaHighGrayLevelEmphasis |
| wavelet-HLH | glszm | SmallAreaLowGrayLevelEmphasis |
| wavelet-HLH | glszm | ZoneEntropy |
| wavelet-HLH | glszm | ZonePercentage |
| wavelet-HLH | glszm | ZoneVariance |
| wavelet-HLH | ngtdm | Busyness |
| wavelet-HLH | ngtdm | Coarseness |
| wavelet-HLH | ngtdm | Complexity |
| wavelet-HLH | ngtdm | Contrast |
| wavelet-HLH | ngtdm | Strength |
| wavelet-HHL | firstorder | 10Percentile |
| wavelet-HHL | firstorder | 90Percentile |
| wavelet-HHL | firstorder | Energy |
| wavelet-HHL | firstorder | Entropy |
| wavelet-HHL | firstorder | InterquartileRange |
| wavelet-HHL | firstorder | Kurtosis |
| wavelet-HHL | firstorder | Maximum |
| wavelet-HHL | firstorder | MeanAbsoluteDeviation |
| wavelet-HHL | firstorder | Mean |
| wavelet-HHL | firstorder | Median |
| wavelet-HHL | firstorder | Minimum |
| wavelet-HHL | firstorder | Range |
| wavelet-HHL | firstorder | RobustMeanAbsoluteDeviation |
| wavelet-HHL | firstorder | RootMeanSquared |
| wavelet-HHL | firstorder | Skewness |
| wavelet-HHL | firstorder | TotalEnergy |
| wavelet-HHL | firstorder | Uniformity |
| wavelet-HHL | firstorder | Variance |
| wavelet-HHL | glcm | Autocorrelation |
| wavelet-HHL | glcm | ClusterProminence |
| wavelet-HHL | glcm | ClusterShade |
| wavelet-HHL | glcm | ClusterTendency |
| wavelet-HHL | glcm | Contrast |
| wavelet-HHL | glcm | Correlation |
| wavelet-HHL | glcm | DifferenceAverage |
| wavelet-HHL | glcm | DifferenceEntropy |
| wavelet-HHL | glcm | DifferenceVariance |
| wavelet-HHL | glcm | Id |
| wavelet-HHL | glcm | Idm |
| wavelet-HHL | glcm | Idmn |
| wavelet-HHL | glcm | Idn |
| wavelet-HHL | glcm | Imc1 |
| wavelet-HHL | glcm | Imc2 |
| wavelet-HHL | glcm | InverseVariance |
| wavelet-HHL | glcm | JointAverage |
| wavelet-HHL | glcm | JointEnergy |
| wavelet-HHL | glcm | JointEntropy |
| wavelet-HHL | glcm | MCC |
| wavelet-HHL | glcm | MaximumProbability |
| wavelet-HHL | glcm | SumAverage |
| wavelet-HHL | glcm | SumEntropy |
| wavelet-HHL | glcm | SumSquares |
| wavelet-HHL | gldm | DependenceEntropy |
| wavelet-HHL | gldm | DependenceNonUniformity |
| wavelet-HHL | gldm | DependenceNonUniformityNormalized |
| wavelet-HHL | gldm | DependenceVariance |
| wavelet-HHL | gldm | GrayLevelNonUniformity |
| wavelet-HHL | gldm | GrayLevelVariance |
| wavelet-HHL | gldm | HighGrayLevelEmphasis |
| wavelet-HHL | gldm | LargeDependenceEmphasis |
| wavelet-HHL | gldm | LargeDependenceHighGrayLevelEmphasis |
| wavelet-HHL | gldm | LargeDependenceLowGrayLevelEmphasis |
| wavelet-HHL | gldm | LowGrayLevelEmphasis |
| wavelet-HHL | gldm | SmallDependenceEmphasis |
| wavelet-HHL | gldm | SmallDependenceHighGrayLevelEmphasis |
| wavelet-HHL | gldm | SmallDependenceLowGrayLevelEmphasis |
| wavelet-HHL | glrlm | GrayLevelNonUniformity |
| wavelet-HHL | glrlm | GrayLevelNonUniformityNormalized |
| wavelet-HHL | glrlm | GrayLevelVariance |
| wavelet-HHL | glrlm | HighGrayLevelRunEmphasis |
| wavelet-HHL | glrlm | LongRunEmphasis |
| wavelet-HHL | glrlm | LongRunHighGrayLevelEmphasis |
| wavelet-HHL | glrlm | LongRunLowGrayLevelEmphasis |
| wavelet-HHL | glrlm | LowGrayLevelRunEmphasis |
| wavelet-HHL | glrlm | RunEntropy |
| wavelet-HHL | glrlm | RunLengthNonUniformity |
| wavelet-HHL | glrlm | RunLengthNonUniformityNormalized |
| wavelet-HHL | glrlm | RunPercentage |
| wavelet-HHL | glrlm | RunVariance |
| wavelet-HHL | glrlm | ShortRunEmphasis |
| wavelet-HHL | glrlm | ShortRunHighGrayLevelEmphasis |
| wavelet-HHL | glrlm | ShortRunLowGrayLevelEmphasis |
| wavelet-HHL | glszm | GrayLevelNonUniformity |
| wavelet-HHL | glszm | GrayLevelNonUniformityNormalized |
| wavelet-HHL | glszm | GrayLevelVariance |
| wavelet-HHL | glszm | HighGrayLevelZoneEmphasis |
| wavelet-HHL | glszm | LargeAreaEmphasis |
| wavelet-HHL | glszm | LargeAreaHighGrayLevelEmphasis |
| wavelet-HHL | glszm | LargeAreaLowGrayLevelEmphasis |
| wavelet-HHL | glszm | LowGrayLevelZoneEmphasis |
| wavelet-HHL | glszm | SizeZoneNonUniformity |
| wavelet-HHL | glszm | SizeZoneNonUniformityNormalized |
| wavelet-HHL | glszm | SmallAreaEmphasis |
| wavelet-HHL | glszm | SmallAreaHighGrayLevelEmphasis |
| wavelet-HHL | glszm | SmallAreaLowGrayLevelEmphasis |
| wavelet-HHL | glszm | ZoneEntropy |
| wavelet-HHL | glszm | ZonePercentage |
| wavelet-HHL | glszm | ZoneVariance |
| wavelet-HHL | ngtdm | Busyness |
| wavelet-HHL | ngtdm | Coarseness |
| wavelet-HHL | ngtdm | Complexity |
| wavelet-HHL | ngtdm | Contrast |
| wavelet-HHL | ngtdm | Strength |
| wavelet-HHH | firstorder | 10Percentile |
| wavelet-HHH | firstorder | 90Percentile |
| wavelet-HHH | firstorder | Energy |
| wavelet-HHH | firstorder | Entropy |
| wavelet-HHH | firstorder | InterquartileRange |
| wavelet-HHH | firstorder | Kurtosis |
| wavelet-HHH | firstorder | Maximum |
| wavelet-HHH | firstorder | MeanAbsoluteDeviation |
| wavelet-HHH | firstorder | Mean |
| wavelet-HHH | firstorder | Median |
| wavelet-HHH | firstorder | Minimum |
| wavelet-HHH | firstorder | Range |
| wavelet-HHH | firstorder | RobustMeanAbsoluteDeviation |
| wavelet-HHH | firstorder | RootMeanSquared |
| wavelet-HHH | firstorder | Skewness |
| wavelet-HHH | firstorder | TotalEnergy |
| wavelet-HHH | firstorder | Uniformity |
| wavelet-HHH | firstorder | Variance |
| wavelet-HHH | glcm | Autocorrelation |
| wavelet-HHH | glcm | ClusterProminence |
| wavelet-HHH | glcm | ClusterShade |
| wavelet-HHH | glcm | ClusterTendency |
| wavelet-HHH | glcm | Contrast |
| wavelet-HHH | glcm | Correlation |
| wavelet-HHH | glcm | DifferenceAverage |
| wavelet-HHH | glcm | DifferenceEntropy |
| wavelet-HHH | glcm | DifferenceVariance |
| wavelet-HHH | glcm | Id |
| wavelet-HHH | glcm | Idm |
| wavelet-HHH | glcm | Idmn |
| wavelet-HHH | glcm | Idn |
| wavelet-HHH | glcm | Imc1 |
| wavelet-HHH | glcm | Imc2 |
| wavelet-HHH | glcm | InverseVariance |
| wavelet-HHH | glcm | JointAverage |
| wavelet-HHH | glcm | JointEnergy |
| wavelet-HHH | glcm | JointEntropy |
| wavelet-HHH | glcm | MCC |
| wavelet-HHH | glcm | MaximumProbability |
| wavelet-HHH | glcm | SumAverage |
| wavelet-HHH | glcm | SumEntropy |
| wavelet-HHH | glcm | SumSquares |
| wavelet-HHH | gldm | DependenceEntropy |
| wavelet-HHH | gldm | DependenceNonUniformity |
| wavelet-HHH | gldm | DependenceNonUniformityNormalized |
| wavelet-HHH | gldm | DependenceVariance |
| wavelet-HHH | gldm | GrayLevelNonUniformity |
| wavelet-HHH | gldm | GrayLevelVariance |
| wavelet-HHH | gldm | HighGrayLevelEmphasis |
| wavelet-HHH | gldm | LargeDependenceEmphasis |
| wavelet-HHH | gldm | LargeDependenceHighGrayLevelEmphasis |
| wavelet-HHH | gldm | LargeDependenceLowGrayLevelEmphasis |
| wavelet-HHH | gldm | LowGrayLevelEmphasis |
| wavelet-HHH | gldm | SmallDependenceEmphasis |
| wavelet-HHH | gldm | SmallDependenceHighGrayLevelEmphasis |
| wavelet-HHH | gldm | SmallDependenceLowGrayLevelEmphasis |
| wavelet-HHH | glrlm | GrayLevelNonUniformity |
| wavelet-HHH | glrlm | GrayLevelNonUniformityNormalized |
| wavelet-HHH | glrlm | GrayLevelVariance |
| wavelet-HHH | glrlm | HighGrayLevelRunEmphasis |
| wavelet-HHH | glrlm | LongRunEmphasis |
| wavelet-HHH | glrlm | LongRunHighGrayLevelEmphasis |
| wavelet-HHH | glrlm | LongRunLowGrayLevelEmphasis |
| wavelet-HHH | glrlm | LowGrayLevelRunEmphasis |
| wavelet-HHH | glrlm | RunEntropy |
| wavelet-HHH | glrlm | RunLengthNonUniformity |
| wavelet-HHH | glrlm | RunLengthNonUniformityNormalized |
| wavelet-HHH | glrlm | RunPercentage |
| wavelet-HHH | glrlm | RunVariance |
| wavelet-HHH | glrlm | ShortRunEmphasis |
| wavelet-HHH | glrlm | ShortRunHighGrayLevelEmphasis |
| wavelet-HHH | glrlm | ShortRunLowGrayLevelEmphasis |
| wavelet-HHH | glszm | GrayLevelNonUniformity |
| wavelet-HHH | glszm | GrayLevelNonUniformityNormalized |
| wavelet-HHH | glszm | GrayLevelVariance |
| wavelet-HHH | glszm | HighGrayLevelZoneEmphasis |
| wavelet-HHH | glszm | LargeAreaEmphasis |
| wavelet-HHH | glszm | LargeAreaHighGrayLevelEmphasis |
| wavelet-HHH | glszm | LargeAreaLowGrayLevelEmphasis |
| wavelet-HHH | glszm | LowGrayLevelZoneEmphasis |
| wavelet-HHH | glszm | SizeZoneNonUniformity |
| wavelet-HHH | glszm | SizeZoneNonUniformityNormalized |
| wavelet-HHH | glszm | SmallAreaEmphasis |
| wavelet-HHH | glszm | SmallAreaHighGrayLevelEmphasis |
| wavelet-HHH | glszm | SmallAreaLowGrayLevelEmphasis |
| wavelet-HHH | glszm | ZoneEntropy |
| wavelet-HHH | glszm | ZonePercentage |
| wavelet-HHH | glszm | ZoneVariance |
| wavelet-HHH | ngtdm | Busyness |
| wavelet-HHH | ngtdm | Coarseness |
| wavelet-HHH | ngtdm | Complexity |
| wavelet-HHH | ngtdm | Contrast |
| wavelet-HHH | ngtdm | Strength |
| wavelet-LLL | firstorder | 10Percentile |
| wavelet-LLL | firstorder | 90Percentile |
| wavelet-LLL | firstorder | Energy |
| wavelet-LLL | firstorder | Entropy |
| wavelet-LLL | firstorder | InterquartileRange |
| wavelet-LLL | firstorder | Kurtosis |
| wavelet-LLL | firstorder | Maximum |
| wavelet-LLL | firstorder | MeanAbsoluteDeviation |
| wavelet-LLL | firstorder | Mean |
| wavelet-LLL | firstorder | Median |
| wavelet-LLL | firstorder | Minimum |
| wavelet-LLL | firstorder | Range |
| wavelet-LLL | firstorder | RobustMeanAbsoluteDeviation |
| wavelet-LLL | firstorder | RootMeanSquared |
| wavelet-LLL | firstorder | Skewness |
| wavelet-LLL | firstorder | TotalEnergy |
| wavelet-LLL | firstorder | Uniformity |
| wavelet-LLL | firstorder | Variance |
| wavelet-LLL | glcm | Autocorrelation |
| wavelet-LLL | glcm | ClusterProminence |
| wavelet-LLL | glcm | ClusterShade |
| wavelet-LLL | glcm | ClusterTendency |
| wavelet-LLL | glcm | Contrast |
| wavelet-LLL | glcm | Correlation |
| wavelet-LLL | glcm | DifferenceAverage |
| wavelet-LLL | glcm | DifferenceEntropy |
| wavelet-LLL | glcm | DifferenceVariance |
| wavelet-LLL | glcm | Id |
| wavelet-LLL | glcm | Idm |
| wavelet-LLL | glcm | Idmn |
| wavelet-LLL | glcm | Idn |
| wavelet-LLL | glcm | Imc1 |
| wavelet-LLL | glcm | Imc2 |
| wavelet-LLL | glcm | InverseVariance |
| wavelet-LLL | glcm | JointAverage |
| wavelet-LLL | glcm | JointEnergy |
| wavelet-LLL | glcm | JointEntropy |
| wavelet-LLL | glcm | MCC |
| wavelet-LLL | glcm | MaximumProbability |
| wavelet-LLL | glcm | SumAverage |
| wavelet-LLL | glcm | SumEntropy |
| wavelet-LLL | glcm | SumSquares |
| wavelet-LLL | gldm | DependenceEntropy |
| wavelet-LLL | gldm | DependenceNonUniformity |
| wavelet-LLL | gldm | DependenceNonUniformityNormalized |
| wavelet-LLL | gldm | DependenceVariance |
| wavelet-LLL | gldm | GrayLevelNonUniformity |
| wavelet-LLL | gldm | GrayLevelVariance |
| wavelet-LLL | gldm | HighGrayLevelEmphasis |
| wavelet-LLL | gldm | LargeDependenceEmphasis |
| wavelet-LLL | gldm | LargeDependenceHighGrayLevelEmphasis |
| wavelet-LLL | gldm | LargeDependenceLowGrayLevelEmphasis |
| wavelet-LLL | gldm | LowGrayLevelEmphasis |
| wavelet-LLL | gldm | SmallDependenceEmphasis |
| wavelet-LLL | gldm | SmallDependenceHighGrayLevelEmphasis |
| wavelet-LLL | gldm | SmallDependenceLowGrayLevelEmphasis |
| wavelet-LLL | glrlm | GrayLevelNonUniformity |
| wavelet-LLL | glrlm | GrayLevelNonUniformityNormalized |
| wavelet-LLL | glrlm | GrayLevelVariance |
| wavelet-LLL | glrlm | HighGrayLevelRunEmphasis |
| wavelet-LLL | glrlm | LongRunEmphasis |
| wavelet-LLL | glrlm | LongRunHighGrayLevelEmphasis |
| wavelet-LLL | glrlm | LongRunLowGrayLevelEmphasis |
| wavelet-LLL | glrlm | LowGrayLevelRunEmphasis |
| wavelet-LLL | glrlm | RunEntropy |
| wavelet-LLL | glrlm | RunLengthNonUniformity |
| wavelet-LLL | glrlm | RunLengthNonUniformityNormalized |
| wavelet-LLL | glrlm | RunPercentage |
| wavelet-LLL | glrlm | RunVariance |
| wavelet-LLL | glrlm | ShortRunEmphasis |
| wavelet-LLL | glrlm | ShortRunHighGrayLevelEmphasis |
| wavelet-LLL | glrlm | ShortRunLowGrayLevelEmphasis |
| wavelet-LLL | glszm | GrayLevelNonUniformity |
| wavelet-LLL | glszm | GrayLevelNonUniformityNormalized |
| wavelet-LLL | glszm | GrayLevelVariance |
| wavelet-LLL | glszm | HighGrayLevelZoneEmphasis |
| wavelet-LLL | glszm | LargeAreaEmphasis |
| wavelet-LLL | glszm | LargeAreaHighGrayLevelEmphasis |
| wavelet-LLL | glszm | LargeAreaLowGrayLevelEmphasis |
| wavelet-LLL | glszm | LowGrayLevelZoneEmphasis |
| wavelet-LLL | glszm | SizeZoneNonUniformity |
| wavelet-LLL | glszm | SizeZoneNonUniformityNormalized |
| wavelet-LLL | glszm | SmallAreaEmphasis |
| wavelet-LLL | glszm | SmallAreaHighGrayLevelEmphasis |
| wavelet-LLL | glszm | SmallAreaLowGrayLevelEmphasis |
| wavelet-LLL | glszm | ZoneEntropy |
| wavelet-LLL | glszm | ZonePercentage |
| wavelet-LLL | glszm | ZoneVariance |
| wavelet-LLL | ngtdm | Busyness |
| wavelet-LLL | ngtdm | Coarseness |
| wavelet-LLL | ngtdm | Complexity |
| wavelet-LLL | ngtdm | Contrast |
| wavelet-LLL | ngtdm | Strength |

- Rad-score formula:

Rad-score=-0.0005209257851529986* wavelet-LLH_firstorder_Minimum

+0.11267271923310583* wavelet-LLH_firstorder_RootMeanSquared

-0.26533765722223396* wavelet-LLH_firstorder_Skewness

+0.7526393296802043* wavelet-LLH_glcm_ClusterTendency

+22.838234591092622* wavelet-LLH_glcm_MCC

+1.793584985764927e-08*wavelet-LLH_glszm_LargeAreaLowGrayLevelEmphasis

+338.200788092314* wavelet-LLH_ngtdm_Coarseness

+2.6371288488284756* wavelet-LLH_ngtdm_Strength

-5.549312074134324* wavelet-LHL_glrlm_RunEntropy

+2.114043485045088e-07* wavelet-LHL_glszm_ZoneVariance

-15.38037658362921* wavelet-LHH_glcm_ClusterTendency

-0.0013283879898698882* wavelet-LHH_glszm_GrayLevelNonUniformity

-8.64839891449183* wavelet-HHL_gldm_DependenceEntropy

+0.3297233187985916* wavelet-HHH_firstorder_Kurtosis

-423.07955849966504* wavelet-HHH_glcm_ClusterTendency


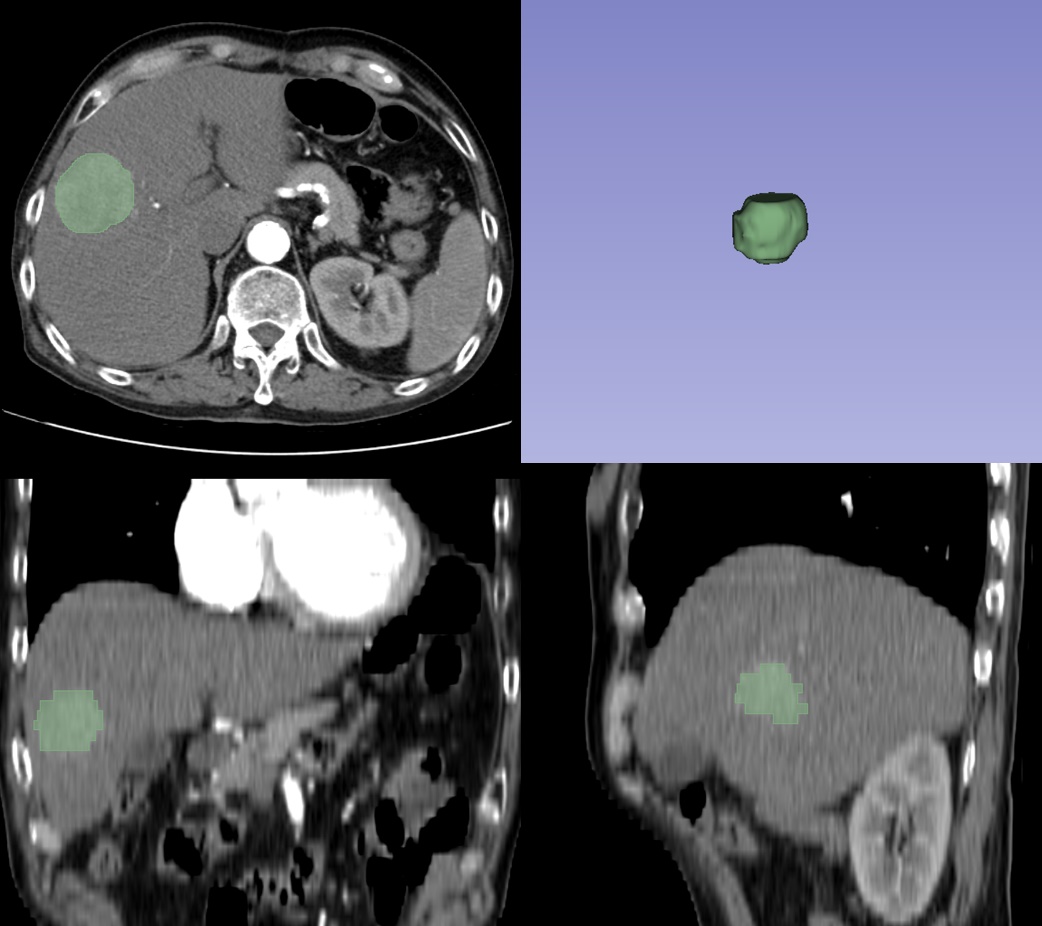


**Figure S1** Segmentation of ROI


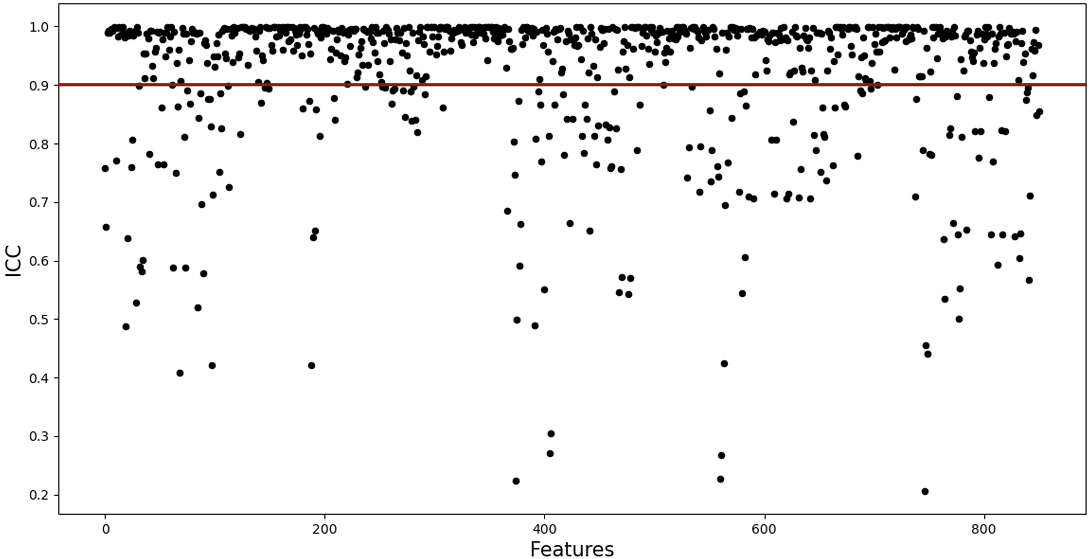


**Figure S2** Evaluate the stability of features using ICC and eliminate features with ICC less than 0.9.
